# Supplementary material for: Salts of barbituric and 2-thiobarbituric acids with imidazole: polymorphism, supramolecular structure, thermal stability and water solubility
Source: Royal Society of Chemistry journal article supplement (doi:10.1039/d3nj04516a), 2023-01-01
Supplement: d3nj04516a1.pdf [file d3nj04516a1.pdf]

**Supplementary Information**

**Salts of barbituric and 2-thiobarbituric acids with imidazole: polymorphism,  
supramolecular structure, thermal stability and water solubility**

**Alexander P. Lakeev,<sup>\*ab</sup> Taisiya S. Sukhikh,<sup>\*\*c</sup> Irina A. Kurzina,<sup>a</sup> Natalia M. Korotchenko<sup>a</sup>  
and Dmitriy S. Nikitin<sup>d</sup>**

<sup>a</sup> *Faculty of Chemistry, National Research Tomsk State University, 36, Lenin Ave., Tomsk  
634050, Russia*

<sup>b</sup> *Goldberg Research Institute of Pharmacology and Regenerative Medicine, Tomsk  
National Research Medical Center, Russian Academy of Sciences, 3, Lenin Ave., Tomsk 634028,  
Russia*

<sup>c</sup> *Nikolaev Institute of Inorganic Chemistry, Siberian Branch of the Russian Academy of  
Sciences, 3, Acad. Lavrentiev Ave., Novosibirsk 630090, Russia*

<sup>d</sup> *National Research Tomsk Polytechnic University, 30, Lenin Ave., Tomsk 634050,  
Russia*

*E-mail addresses: \*lakeev@mail.ru, lakeev\_ap@pharmso.ru,*

*\*\*sukhikh@niic.nsc.ru*

**Table S1.** Crystal data and structure refinement for the compounds.

| Identification code                                          | 1                                                                               | 2                                                                               | 3                                                                               |
|--------------------------------------------------------------|---------------------------------------------------------------------------------|---------------------------------------------------------------------------------|---------------------------------------------------------------------------------|
| CCDC number                                                  | 2244541                                                                         | 2244540                                                                         | 2244542                                                                         |
| Empirical formula                                            | C <sub>7</sub> H <sub>8</sub> N <sub>4</sub> O <sub>3</sub>                     | C <sub>7</sub> H <sub>8</sub> N <sub>4</sub> O <sub>3</sub>                     | C <sub>7</sub> H <sub>8</sub> N <sub>4</sub> O <sub>2</sub> S                   |
| Formula weight                                               | 196.17                                                                          | 196.17                                                                          | 212.23                                                                          |
| Temperature/K                                                | 150(2)                                                                          | 150(2)                                                                          | 150(2)                                                                          |
| Space group                                                  | <i>P</i> -1                                                                     | <i>C</i> 2/ <i>m</i>                                                            | <i>P</i> 2 <sub>1</sub> / <i>m</i>                                              |
| <i>a</i> /Å                                                  | 12.0971(3)                                                                      | 21.3255(17)                                                                     | 8.5356(4)                                                                       |
| <i>b</i> /Å                                                  | 12.1081(3)                                                                      | 12.1156(10)                                                                     | 11.9051(6)                                                                      |
| <i>c</i> /Å                                                  | 13.3996(3)                                                                      | 14.6128(12)                                                                     | 10.5692(4)                                                                      |
| $\alpha$ /°                                                  | 80.9330(10)                                                                     | 90                                                                              | 90                                                                              |
| $\beta$ /°                                                   | 73.8040(10)                                                                     | 119.235(3)                                                                      | 112.3500(10)                                                                    |
| $\gamma$ /°                                                  | 60.9000(10)                                                                     | 90                                                                              | 90                                                                              |
| Volume/Å <sup>3</sup>                                        | 1646.31(7)                                                                      | 3294.6(5)                                                                       | 993.33(8)                                                                       |
| <i>Z</i>                                                     | 8                                                                               | 16                                                                              | 4                                                                               |
| $\rho_{\text{calc}}/\text{g}\times\text{cm}^{-3}$            | 1.583                                                                           | 1.582                                                                           | 1.419                                                                           |
| $\mu/\text{mm}^{-1}$                                         | 0.127                                                                           | 0.127                                                                           | 0.306                                                                           |
| <i>F</i> (000)                                               | 816.0                                                                           | 1632.0                                                                          | 440.0                                                                           |
| Crystal size/mm <sup>3</sup>                                 | 0.16 × 0.15 × 0.11                                                              | 0.26 × 0.11 × 0.08                                                              | 0.22 × 0.11 × 0.05                                                              |
| Radiation                                                    | MoK $\alpha$ ( $\lambda$ = 0.71073)                                             | MoK $\alpha$ ( $\lambda$ = 0.71073)                                             | MoK $\alpha$ ( $\lambda$ = 0.71073)                                             |
| 2 $\Theta$ range for data collection/°                       | 3.166 to 55.796                                                                 | 3.194 to 52.768                                                                 | 5.16 to 52.732                                                                  |
| Index ranges                                                 | -15 ≤ <i>h</i> ≤ 15, -15 ≤ <i>k</i> ≤ 15,<br>-17 ≤ <i>l</i> ≤ 17                | -26 ≤ <i>h</i> ≤ 26, -13 ≤ <i>k</i> ≤ 15,<br>-15 ≤ <i>l</i> ≤ 18                | -10 ≤ <i>h</i> ≤ 10, -11 ≤ <i>k</i> ≤ 14,<br>-12 ≤ <i>l</i> ≤ 13                |
| Reflections collected                                        | 20792                                                                           | 8779                                                                            | 8034                                                                            |
| Independent reflections                                      | 7799 [ <i>R</i> <sub>int</sub> = 0.0305, <i>R</i> <sub>sigma</sub> =<br>0.0389] | 3506 [ <i>R</i> <sub>int</sub> = 0.0380, <i>R</i> <sub>sigma</sub> =<br>0.0496] | 2121 [ <i>R</i> <sub>int</sub> = 0.0276, <i>R</i> <sub>sigma</sub> =<br>0.0258] |
| Data/restraints/parameters                                   | 7799/32/601                                                                     | 3506/18/321                                                                     | 2121/0/136                                                                      |
| Goodness-of-fit on <i>F</i> <sup>2</sup>                     | 1.045                                                                           | 1.042                                                                           | 1.050                                                                           |
| Final <i>R</i> indexes [ <i>I</i> ≥ 2 $\sigma$ ( <i>I</i> )] | <i>R</i> <sub>1</sub> = 0.0424, <i>wR</i> <sub>2</sub> = 0.0988                 | <i>R</i> <sub>1</sub> = 0.0503, <i>wR</i> <sub>2</sub> = 0.1067                 | <i>R</i> <sub>1</sub> = 0.0342, <i>wR</i> <sub>2</sub> = 0.0828                 |
| Final <i>R</i> indexes [all data]                            | <i>R</i> <sub>1</sub> = 0.0539, <i>wR</i> <sub>2</sub> = 0.1068                 | <i>R</i> <sub>1</sub> = 0.0759, <i>wR</i> <sub>2</sub> = 0.1195                 | <i>R</i> <sub>1</sub> = 0.0433, <i>wR</i> <sub>2</sub> = 0.0890                 |
| Largest diff. peak/hole/eÅ <sup>-3</sup>                     | 0.24/-0.27                                                                      | 0.22/-0.30                                                                      | 0.22/-0.23                                                                      |

**Table S2.** Bond lengths for non-hydrogen atoms in compound 1.

| Atom  | Atom  | Length/Å   | Atom  | Atom  | Length/Å   | Atom  | Atom  | Length/Å   |
|-------|-------|------------|-------|-------|------------|-------|-------|------------|
| O11_1 | C12_1 | 1.2265(17) | O12_3 | C14_3 | 1.2600(17) | N23_5 | C22_5 | 1.321(2)   |
| O12_1 | C14_1 | 1.2687(18) | O13_3 | C16_3 | 1.2666(18) | N23_5 | C24_5 | 1.361(2)   |
| O13_1 | C16_1 | 1.2745(17) | N11_3 | C12_3 | 1.3630(18) | C24_5 | C25_5 | 1.346(2)   |
| N11_1 | C12_1 | 1.3674(18) | N11_3 | C16_3 | 1.3969(18) | N21_6 | C22_6 | 1.3273(19) |
| N11_1 | C16_1 | 1.3844(18) | N13_3 | C12_3 | 1.3630(19) | N21_6 | C25_6 | 1.369(2)   |
| N13_1 | C12_1 | 1.3623(19) | N13_3 | C14_3 | 1.3910(18) | N23_6 | C22_6 | 1.319(2)   |
| N13_1 | C14_1 | 1.3774(18) | C14_3 | C15_3 | 1.398(2)   | N23_6 | C24_6 | 1.3748(19) |
| C14_1 | C15_1 | 1.395(2)   | C15_3 | C16_3 | 1.389(2)   | C24_6 | C25_6 | 1.354(2)   |
| C15_1 | C16_1 | 1.391(2)   | O11_4 | C12_4 | 1.2262(17) | N21_7 | C22_7 | 1.328(2)   |
| O11_2 | C12_2 | 1.2339(16) | O12_4 | C14_4 | 1.2705(17) | N21_7 | C25_7 | 1.369(2)   |
| O12_2 | C14_2 | 1.2651(17) | O13_4 | C16_4 | 1.2731(16) | N23_7 | C22_7 | 1.324(2)   |
| O13_2 | C16_2 | 1.2632(16) | N11_4 | C12_4 | 1.3663(18) | N23_7 | C24_7 | 1.375(2)   |
| N11_2 | C12_2 | 1.3655(17) | N11_4 | C16_4 | 1.3828(18) | C24_7 | C25_7 | 1.350(2)   |
| N11_2 | C16_2 | 1.3983(17) | N13_4 | C12_4 | 1.3645(18) | N21_8 | C22_8 | 1.3201(19) |
| N13_2 | C12_2 | 1.3646(18) | N13_4 | C14_4 | 1.3815(17) | N21_8 | C25_8 | 1.3717(19) |
| N13_2 | C14_2 | 1.3971(17) | C14_4 | C15_4 | 1.392(2)   | N23_8 | C22_8 | 1.3201(19) |
| C14_2 | C15_2 | 1.3915(19) | C15_4 | C16_4 | 1.392(2)   | N23_8 | C24_8 | 1.371(2)   |
| C15_2 | C16_2 | 1.391(2)   | N21_5 | C22_5 | 1.328(2)   | C24_8 | C25_8 | 1.351(2)   |
| O11_3 | C12_3 | 1.2352(17) | N21_5 | C25_5 | 1.371(2)   |       |       |            |

**Table S3.** Bond lengths for non-hydrogen atoms in compound 2.

| Atom  | Atom               | Length/Å | Atom  | Atom               | Length/Å | Atom  | Atom               | Length/Å |
|-------|--------------------|----------|-------|--------------------|----------|-------|--------------------|----------|
| O11_1 | C11_1              | 1.223(3) | C13_2 | C12_2 <sup>1</sup> | 1.397(3) | C12_4 | C13_4              | 1.393(2) |
| O12_1 | C12_1              | 1.275(2) | O11_3 | C11_3              | 1.235(3) | C13_4 | C12_4 <sup>1</sup> | 1.393(3) |
| N11_1 | C11_1              | 1.367(2) | O12_3 | C12_3              | 1.266(2) | N21_5 | C22_5              | 1.320(3) |
| N11_1 | C12_1              | 1.385(3) | N11_3 | C11_3              | 1.363(2) | N21_5 | C25_5              | 1.362(3) |
| C11_1 | N11_1 <sup>1</sup> | 1.367(2) | N11_3 | C12_3              | 1.394(2) | N23_5 | C22_5              | 1.319(3) |
| C12_1 | C13_1              | 1.391(3) | C11_3 | N11_3 <sup>1</sup> | 1.363(2) | N23_5 | C24_5              | 1.354(3) |
| C13_1 | C12_1 <sup>1</sup> | 1.391(3) | C12_3 | C13_3              | 1.396(2) | C24_5 | C25_5              | 1.349(3) |
| O11_2 | C11_2              | 1.228(3) | C13_3 | C12_3 <sup>1</sup> | 1.396(2) | N21_6 | C22_6              | 1.320(3) |
| O12_2 | C12_2              | 1.267(2) | O11_4 | C11_4              | 1.240(3) | N21_6 | C25_6              | 1.357(3) |
| N11_2 | C11_2              | 1.363(2) | O12_4 | C12_4              | 1.264(3) | N23_6 | C22_6              | 1.324(3) |
| N11_2 | C12_2              | 1.386(3) | N11_4 | C11_4              | 1.358(2) | N23_6 | C24_6              | 1.354(3) |
| C11_2 | N11_2 <sup>1</sup> | 1.363(2) | N11_4 | C12_4              | 1.396(3) | C24_6 | C25_6              | 1.348(3) |
| C12_2 | C13_2              | 1.397(3) | C11_4 | N11_4 <sup>1</sup> | 1.358(2) |       |                    |          |

<sup>1</sup> +X, 1 – Y, +Z.**Table S4.** Bond lengths for non-hydrogen atoms in compound 3.

| Atom  | Atom               | Length/Å   | Atom  | Atom               | Length/Å   | Atom  | Atom  | Length/Å |
|-------|--------------------|------------|-------|--------------------|------------|-------|-------|----------|
| S11_1 | C12_1              | 1.677(2)   | S11_2 | C12_2              | 1.674(2)   | N21_3 | C22_3 | 1.321(2) |
| O12_1 | C14_1              | 1.2671(19) | O12_2 | C14_2              | 1.2684(19) | N21_3 | C25_3 | 1.364(2) |
| N11_1 | C12_1              | 1.3540(17) | N11_2 | C12_2              | 1.3584(17) | N23_3 | C22_3 | 1.325(2) |
| N11_1 | C14_1              | 1.393(2)   | N11_2 | C14_2              | 1.3916(19) | N23_3 | C24_3 | 1.366(2) |
| C12_1 | N11_1 <sup>1</sup> | 1.3540(17) | C12_2 | N11_2 <sup>2</sup> | 1.3584(17) | C24_3 | C25_3 | 1.348(2) |
| C13_1 | C14_1 <sup>1</sup> | 1.3942(19) | C13_2 | C14_2 <sup>2</sup> | 1.3911(19) |       |       |          |
| C13_1 | C14_1              | 1.3942(19) | C13_2 | C14_2              | 1.3911(19) |       |       |          |

<sup>1</sup> +X, 1/2 – Y, +Z; <sup>2</sup> +X, 3/2 – Y, +Z.

**Table S5.** Hydrogen bond characteristics for the structural model of compound **1** with the hydrogen atoms refined freely with default standard uncertainty (0.02 Å) for the restraint of 0.88 Å on the N–H bonds (a); for the same model with hydrogens displaced at 0.88 Å along the corresponding N–H bond (b); for the model with geometrically placed hydrogens (lying on the external bisector of the corresponding C–N–C angle; c); for the model with non-spherical atomic scattering factors (d). Superscript at an atom corresponds to the atomic number according to Figs. 1 and 2; the number after underscore corresponds to the residue number according to Fig. 3.

| Compound     | N                 | H                 | O                 | N–H, Å    | H···O, Å  | N···O, Å   | N–H···O, deg. |
|--------------|-------------------|-------------------|-------------------|-----------|-----------|------------|---------------|
| <b>1 (a)</b> | N <sup>1</sup> _1 | H <sup>1</sup> _1 | O <sup>4</sup> _3 | 0.879(13) | 2.100(14) | 2.9561(17) | 164.2(15)     |
|              | N <sup>1</sup> _2 | H <sup>1</sup> _2 | O <sup>4</sup> _4 | 0.860(13) | 2.046(14) | 2.8988(16) | 171.2(15)     |
|              | N <sup>1</sup> _3 | H <sup>1</sup> _3 | O <sup>4</sup> _1 | 0.877(14) | 1.999(14) | 2.8751(16) | 176.1(16)     |
|              | N <sup>1</sup> _4 | H <sup>1</sup> _4 | O <sup>4</sup> _2 | 0.862(14) | 2.040(14) | 2.8904(16) | 168.8(16)     |
|              | N <sup>3</sup> _1 | H <sup>3</sup> _1 | O <sup>6</sup> _3 | 0.895(13) | 1.973(14) | 2.8669(16) | 176.5(16)     |
|              | N <sup>3</sup> _2 | H <sup>3</sup> _2 | O <sup>6</sup> _4 | 0.861(13) | 2.195(14) | 3.0056(16) | 156.6(15)     |
|              | N <sup>3</sup> _3 | H <sup>3</sup> _3 | O <sup>6</sup> _1 | 0.877(13) | 2.061(14) | 2.9198(16) | 165.9(15)     |
|              | N <sup>3</sup> _4 | H <sup>3</sup> _4 | O <sup>6</sup> _2 | 0.883(14) | 2.005(14) | 2.8869(15) | 177.0(16)     |
|              | N <sup>1</sup> _5 | H <sup>1</sup> _5 | O <sup>4</sup> _3 | 0.933(14) | 1.816(14) | 2.7444(17) | 172.8(17)     |
|              | N <sup>1</sup> _6 | H <sup>1</sup> _6 | O <sup>6</sup> _2 | 0.898(13) | 1.764(14) | 2.6585(16) | 173.4(16)     |
|              | N <sup>1</sup> _7 | H <sup>1</sup> _7 | O <sup>6</sup> _3 | 0.907(14) | 1.765(14) | 2.6664(16) | 171.8(17)     |
|              | N <sup>1</sup> _8 | H <sup>1</sup> _8 | O <sup>4</sup> _2 | 0.905(14) | 1.761(14) | 2.6607(15) | 172.4(16)     |
|              | N <sup>3</sup> _5 | H <sup>3</sup> _5 | O <sup>6</sup> _1 | 0.902(14) | 1.714(14) | 2.6014(16) | 167.2(17)     |
|              | N <sup>3</sup> _6 | H <sup>3</sup> _6 | O <sup>4</sup> _4 | 0.897(14) | 1.741(14) | 2.6337(15) | 173.3(16)     |
|              | N <sup>3</sup> _7 | H <sup>3</sup> _7 | O <sup>4</sup> _1 | 0.889(14) | 1.777(14) | 2.6593(16) | 171.6(17)     |
|              | N <sup>3</sup> _8 | H <sup>3</sup> _8 | O <sup>6</sup> _4 | 0.896(14) | 1.736(14) | 2.6216(16) | 169.3(16)     |
| <b>1 (b)</b> | N <sup>1</sup> _1 | H <sup>1</sup> _1 | O <sup>4</sup> _3 | 0.88      | 2.10      | 2.9561(17) | 164.3         |
|              | N <sup>1</sup> _2 | H <sup>1</sup> _2 | O <sup>4</sup> _4 | 0.88      | 2.03      | 2.8988(16) | 172.0         |
|              | N <sup>1</sup> _3 | H <sup>1</sup> _3 | O <sup>4</sup> _1 | 0.88      | 2.00      | 2.8751(16) | 175.9         |
|              | N <sup>1</sup> _4 | H <sup>1</sup> _4 | O <sup>4</sup> _2 | 0.88      | 2.02      | 2.8904(16) | 167.9         |
|              | N <sup>3</sup> _1 | H <sup>3</sup> _1 | O <sup>6</sup> _3 | 0.88      | 1.99      | 2.8669(16) | 175.9         |
|              | N <sup>3</sup> _2 | H <sup>3</sup> _2 | O <sup>6</sup> _4 | 0.88      | 2.19      | 3.0056(16) | 155.0         |
|              | N <sup>3</sup> _3 | H <sup>3</sup> _3 | O <sup>6</sup> _1 | 0.88      | 2.06      | 2.9198(16) | 164.8         |
|              | N <sup>3</sup> _4 | H <sup>3</sup> _4 | O <sup>6</sup> _2 | 0.88      | 2.01      | 2.8869(15) | 177.5         |
|              | N <sup>1</sup> _5 | H <sup>1</sup> _5 | O <sup>4</sup> _3 | 0.88      | 1.87      | 2.7444(17) | 174.0         |
|              | N <sup>1</sup> _6 | H <sup>1</sup> _6 | O <sup>6</sup> _2 | 0.88      | 1.78      | 2.6585(16) | 175.3         |
|              | N <sup>1</sup> _7 | H <sup>1</sup> _7 | O <sup>6</sup> _3 | 0.88      | 1.79      | 2.6664(16) | 174.1         |
|              | N <sup>1</sup> _8 | H <sup>1</sup> _8 | O <sup>4</sup> _2 | 0.88      | 1.78      | 2.6607(15) | 173.5         |
|              | N <sup>3</sup> _5 | H <sup>3</sup> _5 | O <sup>6</sup> _1 | 0.88      | 1.73      | 2.6014(16) | 169.0         |
|              | N <sup>3</sup> _6 | H <sup>3</sup> _6 | O <sup>4</sup> _4 | 0.88      | 1.76      | 2.6337(15) | 174.1         |
|              | N <sup>3</sup> _7 | H <sup>3</sup> _7 | O <sup>4</sup> _1 | 0.88      | 1.79      | 2.6593(16) | 171.5         |
|              | N <sup>3</sup> _8 | H <sup>3</sup> _8 | O <sup>6</sup> _4 | 0.88      | 1.75      | 2.6216(16) | 171.3         |
| <b>1 (c)</b> | N <sup>1</sup> _1 | H <sup>1</sup> _1 | O <sup>4</sup> _3 | 0.88      | 2.09      | 2.9560(17) | 166.3         |
|              | N <sup>1</sup> _2 | H <sup>1</sup> _2 | O <sup>4</sup> _4 | 0.88      | 2.03      | 2.8982(16) | 168.3         |
|              | N <sup>1</sup> _3 | H <sup>1</sup> _3 | O <sup>4</sup> _1 | 0.88      | 2.00      | 2.8752(16) | 177.4         |
|              | N <sup>1</sup> _4 | H <sup>1</sup> _4 | O <sup>4</sup> _2 | 0.88      | 2.02      | 2.8898(16) | 167.6         |
|              | N <sup>3</sup> _1 | H <sup>3</sup> _1 | O <sup>6</sup> _3 | 0.88      | 1.99      | 2.8668(16) | 175.2         |
|              | N <sup>3</sup> _2 | H <sup>3</sup> _2 | O <sup>6</sup> _4 | 0.88      | 2.19      | 3.0049(15) | 153.1         |
|              | N <sup>3</sup> _3 | H <sup>3</sup> _3 | O <sup>6</sup> _1 | 0.88      | 2.08      | 2.9190(16) | 158.2         |
|              | N <sup>3</sup> _4 | H <sup>3</sup> _4 | O <sup>6</sup> _2 | 0.88      | 2.01      | 2.8865(15) | 172.8         |
|              | N <sup>1</sup> _5 | H <sup>1</sup> _5 | O <sup>4</sup> _3 | 0.88      | 1.88      | 2.7460(17) | 169.9         |
|              | N <sup>1</sup> _6 | H <sup>1</sup> _6 | O <sup>6</sup> _2 | 0.88      | 1.78      | 2.6589(16) | 172.0         |

|              |                   |                   |                   |           |           |            |           |
|--------------|-------------------|-------------------|-------------------|-----------|-----------|------------|-----------|
|              | N <sup>1</sup> _7 | H <sup>1</sup> _7 | O <sup>6</sup> _3 | 0.88      | 1.80      | 2.6666(16) | 170.0     |
|              | N <sup>1</sup> _8 | H <sup>1</sup> _8 | O <sup>4</sup> _2 | 0.88      | 1.79      | 2.6618(16) | 171.5     |
|              | N <sup>3</sup> _5 | H <sup>3</sup> _5 | O <sup>6</sup> _1 | 0.88      | 1.73      | 2.6021(16) | 169.8     |
|              | N <sup>3</sup> _6 | H <sup>3</sup> _6 | O <sup>4</sup> _4 | 0.88      | 1.76      | 2.6344(16) | 169.8     |
|              | N <sup>3</sup> _7 | H <sup>3</sup> _7 | O <sup>4</sup> _1 | 0.88      | 1.78      | 2.6600(16) | 174.1     |
|              | N <sup>3</sup> _8 | H <sup>3</sup> _8 | O <sup>6</sup> _4 | 0.88      | 1.76      | 2.6227(16) | 166.8     |
| <b>1 (d)</b> | N <sup>1</sup> _1 | H <sup>1</sup> _1 | O <sup>4</sup> _3 | 1.006(13) | 1.970(14) | 2.9562(13) | 165.7(11) |
|              | N <sup>1</sup> _2 | H <sup>1</sup> _2 | O <sup>4</sup> _4 | 0.974(12) | 1.934(13) | 2.9013(13) | 172.1(11) |
|              | N <sup>1</sup> _3 | H <sup>1</sup> _3 | O <sup>4</sup> _1 | 1.017(14) | 1.861(14) | 2.8764(13) | 176.0(11) |
|              | N <sup>1</sup> _4 | H <sup>1</sup> _4 | O <sup>4</sup> _2 | 0.959(13) | 1.944(13) | 2.8917(13) | 169.1(11) |
|              | N <sup>3</sup> _1 | H <sup>3</sup> _1 | O <sup>6</sup> _3 | 1.002(13) | 1.866(13) | 2.8657(13) | 175.8(11) |
|              | N <sup>3</sup> _2 | H <sup>3</sup> _2 | O <sup>6</sup> _4 | 0.986(12) | 2.081(13) | 3.0067(12) | 155.5(1)  |
|              | N <sup>3</sup> _3 | H <sup>3</sup> _3 | O <sup>6</sup> _1 | 0.982(12) | 1.960(13) | 2.9172(13) | 164.4(11) |
|              | N <sup>3</sup> _4 | H <sup>3</sup> _4 | O <sup>6</sup> _2 | 0.998(13) | 1.891(14) | 2.8881(12) | 176.6(11) |
|              | N <sup>1</sup> _5 | H <sup>1</sup> _5 | O <sup>4</sup> _3 | 1.051(16) | 1.699(17) | 2.7451(13) | 172.8(13) |
|              | N <sup>1</sup> _6 | H <sup>1</sup> _6 | O <sup>6</sup> _2 | 1.040(15) | 1.620(15) | 2.6551(13) | 172.4(12) |
|              | N <sup>1</sup> _7 | H <sup>1</sup> _7 | O <sup>6</sup> _3 | 1.013(14) | 1.658(14) | 2.6640(13) | 171.5(13) |
|              | N <sup>1</sup> _8 | H <sup>1</sup> _8 | O <sup>4</sup> _2 | 1.014(13) | 1.648(14) | 2.6566(12) | 172.2(12) |
|              | N <sup>3</sup> _5 | H <sup>3</sup> _5 | O <sup>6</sup> _1 | 1.030(14) | 1.581(14) | 2.5975(13) | 167.8(13) |
|              | N <sup>3</sup> _6 | H <sup>3</sup> _6 | O <sup>4</sup> _4 | 1.028(13) | 1.606(14) | 2.6303(12) | 173.9(12) |
|              | N <sup>3</sup> _7 | H <sup>3</sup> _7 | O <sup>4</sup> _1 | 0.995(14) | 1.666(14) | 2.6565(13) | 173.0(12) |
|              | N <sup>3</sup> _8 | H <sup>3</sup> _8 | O <sup>6</sup> _4 | 1.042(13) | 1.584(14) | 2.6172(12) | 170.5(12) |

**Table S6.** Hydrogen bond characteristics for the structural model of compound **2** with the hydrogen atoms refined freely with standard uncertainty (0.02 Å) for the restraint of 0.88 Å on the N–H bonds (a); for the same model with hydrogens displaced at 0.88 Å along the corresponding N–H bond (b); for the model with geometrically placed hydrogens (lying on the external bisector of the corresponding C–N–C angle; c); for the model with non-spherical atomic scattering factors (d). Superscript at an atom corresponds to the atomic number according to Figs. 1 and 2; the number after underscore corresponds to the residue number according to Fig. 3.

| Compound     | N                 | H                 | O                 | N–H, Å    | H···O, Å  | N···O, Å   | N–H···O, deg. |
|--------------|-------------------|-------------------|-------------------|-----------|-----------|------------|---------------|
| <b>2</b> (a) | N <sup>1</sup> _1 | H <sup>1</sup> _1 | O <sup>4</sup> _3 | 0.891(16) | 2.016(16) | 2.906(2)   | 177(2)        |
|              | N <sup>1</sup> _2 | H <sup>1</sup> _2 | O <sup>4</sup> _4 | 0.867(16) | 2.030(16) | 2.892(2)   | 173(2)        |
|              | N <sup>1</sup> _3 | H <sup>1</sup> _3 | O <sup>4</sup> _1 | 0.877(16) | 2.023(16) | 2.900(2)   | 178(2)        |
|              | N <sup>1</sup> _4 | H <sup>1</sup> _4 | O <sup>4</sup> _2 | 0.886(16) | 2.028(16) | 2.911(2)   | 175(2)        |
|              | N <sup>1</sup> _5 | H <sup>1</sup> _5 | O <sup>4</sup> _3 | 0.890(16) | 1.811(16) | 2.697(2)   | 173(2)        |
|              | N <sup>1</sup> _6 | H <sup>1</sup> _6 | O <sup>4</sup> _2 | 0.897(16) | 1.773(17) | 2.659(2)   | 169(2)        |
|              | N <sup>3</sup> _5 | H <sup>3</sup> _5 | O <sup>4</sup> _1 | 0.870(16) | 1.782(17) | 2.642(2)   | 170(2)        |
|              | N <sup>3</sup> _6 | H <sup>3</sup> _6 | O <sup>4</sup> _4 | 0.894(16) | 1.790(16) | 2.672(2)   | 168(2)        |
| <b>2</b> (b) | N <sup>1</sup> _1 | H <sup>1</sup> _1 | O <sup>4</sup> _3 | 0.88      | 2.03      | 2.906(2)   | 177.5         |
|              | N <sup>1</sup> _2 | H <sup>1</sup> _2 | O <sup>4</sup> _4 | 0.88      | 2.02      | 2.892(2)   | 172.4         |
|              | N <sup>1</sup> _3 | H <sup>1</sup> _3 | O <sup>4</sup> _1 | 0.88      | 2.02      | 2.900(2)   | 178.5         |
|              | N <sup>1</sup> _4 | H <sup>1</sup> _4 | O <sup>4</sup> _2 | 0.88      | 2.03      | 2.911(2)   | 175.2         |
|              | N <sup>1</sup> _5 | H <sup>1</sup> _5 | O <sup>4</sup> _3 | 0.88      | 1.82      | 2.697(2)   | 173.8         |
|              | N <sup>1</sup> _6 | H <sup>1</sup> _6 | O <sup>4</sup> _2 | 0.88      | 1.79      | 2.659(2)   | 169.9         |
|              | N <sup>3</sup> _5 | H <sup>3</sup> _5 | O <sup>4</sup> _1 | 0.88      | 1.77      | 2.642(2)   | 168.9         |
|              | N <sup>3</sup> _6 | H <sup>3</sup> _6 | O <sup>4</sup> _4 | 0.88      | 1.80      | 2.672(2)   | 169.8         |
| <b>2</b> (c) | N <sup>1</sup> _1 | H <sup>1</sup> _1 | O <sup>4</sup> _3 | 0.88      | 2.03      | 2.905(2)   | 176.5         |
|              | N <sup>1</sup> _2 | H <sup>1</sup> _2 | O <sup>4</sup> _4 | 0.88      | 2.01      | 2.891(2)   | 177.8         |
|              | N <sup>1</sup> _3 | H <sup>1</sup> _3 | O <sup>4</sup> _1 | 0.88      | 2.02      | 2.899(2)   | 174.9         |
|              | N <sup>1</sup> _4 | H <sup>1</sup> _4 | O <sup>4</sup> _2 | 0.88      | 2.05      | 2.911(2)   | 165.5         |
|              | N <sup>1</sup> _5 | H <sup>1</sup> _5 | O <sup>4</sup> _3 | 0.88      | 1.83      | 2.697(2)   | 170.5         |
|              | N <sup>1</sup> _6 | H <sup>1</sup> _6 | O <sup>4</sup> _2 | 0.88      | 1.79      | 2.659(2)   | 167.5         |
|              | N <sup>3</sup> _5 | H <sup>3</sup> _5 | O <sup>4</sup> _1 | 0.88      | 1.78      | 2.642(2)   | 167.9         |
|              | N <sup>3</sup> _6 | H <sup>3</sup> _6 | O <sup>4</sup> _4 | 0.88      | 1.80      | 2.673(2)   | 169.1         |
| <b>2</b> (d) | N <sup>1</sup> _1 | H <sup>1</sup> _1 | O <sup>4</sup> _3 | 1.04(2)   | 1.87(2)   | 2.9053(19) | 177.2(16)     |
|              | N <sup>1</sup> _2 | H <sup>1</sup> _2 | O <sup>4</sup> _4 | 0.97(2)   | 1.93(2)   | 2.895(2)   | 171.8(18)     |
|              | N <sup>1</sup> _3 | H <sup>1</sup> _3 | O <sup>4</sup> _1 | 1.00(2)   | 1.90(2)   | 2.8984(19) | 177.0(18)     |
|              | N <sup>1</sup> _4 | H <sup>1</sup> _4 | O <sup>4</sup> _2 | 0.99(2)   | 1.92(2)   | 2.9121(19) | 172.8(17)     |
|              | N <sup>1</sup> _5 | H <sup>1</sup> _5 | O <sup>4</sup> _3 | 1.05(3)   | 1.64(3)   | 2.6944(19) | 174(2)        |
|              | N <sup>1</sup> _6 | H <sup>1</sup> _6 | O <sup>4</sup> _2 | 1.05(3)   | 1.61(3)   | 2.6552(19) | 171(2)        |
|              | N <sup>3</sup> _5 | H <sup>3</sup> _5 | O <sup>4</sup> _1 | 1.01(3)   | 1.64(3)   | 2.6403(19) | 170(3)        |
|              | N <sup>3</sup> _6 | H <sup>3</sup> _6 | O <sup>4</sup> _4 | 1.04(2)   | 1.64(2)   | 2.6687(19) | 169(2)        |

**Table S7.** Hydrogen bond characteristics for the structural model of compound **3** with the hydrogen atoms refined freely with default standard uncertainty (0.02 Å) for the restraint of 0.88 Å on the N–H bonds (a); for the same model with hydrogens displaced at 0.88 Å along the corresponding N–H bond (b); for the model with geometrically placed hydrogens (lying on the external bisector of the corresponding C–N–C angle; c); for the model with non-spherical atomic scattering factors (d). Superscript at an atom corresponds to the atomic number according to Figs. 1 and 2; the number after underscore corresponds to the residue number according to Fig. 3.

| Compound     | N                 | H                 | O                 | N–H, Å    | H···O, Å  | N···O, Å   | N–H···O, deg. |
|--------------|-------------------|-------------------|-------------------|-----------|-----------|------------|---------------|
| <b>3</b> (a) | N <sup>1</sup> _1 | H <sup>1</sup> _1 | O <sup>4</sup> _2 | 0.870(14) | 1.956(14) | 2.8244(17) | 175.8(17)     |
|              | N <sup>1</sup> _2 | H <sup>1</sup> _2 | O <sup>4</sup> _1 | 0.863(14) | 1.942(14) | 2.8030(17) | 175.6(16)     |
|              | N <sup>1</sup> _3 | H <sup>1</sup> _3 | O <sup>4</sup> _2 | 0.864(14) | 1.855(14) | 2.7106(17) | 169.9(18)     |
|              | N <sup>3</sup> _3 | H <sup>3</sup> _3 | O <sup>4</sup> _1 | 0.857(14) | 1.853(15) | 2.6942(17) | 166.7(18)     |
| <b>3</b> (b) | N <sup>1</sup> _1 | H <sup>1</sup> _1 | O <sup>4</sup> _2 | 0.88      | 1.95      | 2.8244(17) | 175.2         |
|              | N <sup>1</sup> _2 | H <sup>1</sup> _2 | O <sup>4</sup> _1 | 0.88      | 1.93      | 2.8030(17) | 175.1         |
|              | N <sup>1</sup> _3 | H <sup>1</sup> _3 | O <sup>4</sup> _2 | 0.88      | 1.84      | 2.7106(17) | 168.7         |
|              | N <sup>3</sup> _3 | H <sup>3</sup> _3 | O <sup>4</sup> _1 | 0.88      | 1.83      | 2.6942(17) | 166.2         |
| <b>3</b> (c) | N <sup>1</sup> _1 | H <sup>1</sup> _1 | O <sup>4</sup> _2 | 0.88      | 1.95      | 2.8240(17) | 175.9         |
|              | N <sup>1</sup> _2 | H <sup>1</sup> _2 | O <sup>4</sup> _1 | 0.88      | 1.92      | 2.8028(17) | 178.6         |
|              | N <sup>1</sup> _3 | H <sup>1</sup> _3 | O <sup>4</sup> _2 | 0.88      | 1.85      | 2.7108(17) | 165.8         |
|              | N <sup>3</sup> _3 | H <sup>3</sup> _3 | O <sup>4</sup> _1 | 0.88      | 1.83      | 2.6939(17) | 167.6         |
| <b>3</b> (d) | N <sup>1</sup> _1 | H <sup>1</sup> _1 | O <sup>4</sup> _2 | 1.047(14) | 1.776(14) | 2.8225(11) | 177.5(10)     |
|              | N <sup>1</sup> _2 | H <sup>1</sup> _2 | O <sup>4</sup> _1 | 1.037(15) | 1.768(15) | 2.8029(12) | 176.0(11)     |
|              | N <sup>1</sup> _3 | H <sup>1</sup> _3 | O <sup>4</sup> _2 | 1.007(14) | 1.709(15) | 2.7067(11) | 170.2(14)     |
|              | N <sup>3</sup> _3 | H <sup>3</sup> _3 | O <sup>4</sup> _1 | 1.007(15) | 1.698(16) | 2.6907(11) | 167.8(13)     |

**Table S8.** Geometry characteristics of a pair of HBA<sup>-</sup> anions that hydrogen-bonded with each other in a side-to-side fashion in structures found in Cambridge Structural Database (CSD; version 5.43, updates up to November 2022) and in **1–3**.  $\gamma$  (deg.) – Dihedral angle between the mean planes;  $d1,2$  (Å) – N···O distance;  $\alpha1,2$  (deg.) – N–H···O angle,  $R_1$  (%) – factor,  $Z$  – cell formula units;  $Z'$  – number of HBA<sup>-</sup> in crystallographically independent part; T (K) – experiment temperature.

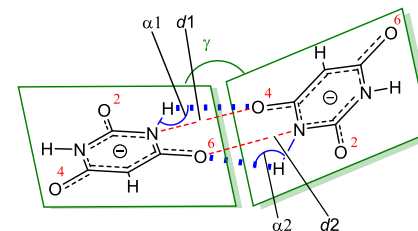

| CSD Refcode | $\gamma$ | $d1$ | $d2$ | $\alpha1$ | $\alpha2$ | $R_1$ | $Z$ | $Z'$ | T   | Compound name                                                                                                |
|-------------|----------|------|------|-----------|-----------|-------|-----|------|-----|--------------------------------------------------------------------------------------------------------------|
| EVELAV      | 49.9     | 2.83 | 2.83 | 173.5     | 173.5     | 6.5   | 8   | 1    | 150 | 8-(dimethylamino)-N,N-dimethylnaphthalen-1-aminium barbiturate unknown solvate                               |
| VUKFIR      | 42.6     | 2.80 | 2.83 | 163.7     | 169.4     | 5.1   | 6   | 0.5  | 298 | catena-[( $\mu_2$ -4,4'-bipyridine-N,N')-tetra-aqua-nickel(II) bis(barbiturate) hexahydrate]                 |
| VUKFOX      | 42.5     | 2.80 | 2.83 | 163.5     | 169.8     | 5.3   | 6   | 0.5  | 298 | catena-[( $\mu_2$ -4,4'-bipyridine-N,N')-tetra-aqua-copper(II) bis(barbiturate) hexahydrate]                 |
| VUKFEN      | 38.2     | 2.81 | 2.81 | 169.3     | 169.3     | 3.3   | 3   | 0.25 | 298 | catena-[( $\mu_2$ -4,4'-bipyridine-N,N')-tetra-aqua-cobalt(II) bis(barbiturate) hexahydrate]                 |
| BUYIIE      | 38.0     | 2.82 | 2.82 | 167.6     | 167.6     | 4.2   | 3   | 0.25 | 293 | catena-[( $\mu_2$ -4,4'-bipyridine)-tetra-aqua-zinc(II) bis(barbiturate) hexahydrate]                        |
| BUYIEA      | 37.2     | 2.83 | 2.83 | 170.3     | 170.3     | 3.3   | 3   | 0.25 | 293 | catena-[( $\mu_2$ -4,4'-bipyridine)-tetra-aqua-iron(II) bis(barbiturate) hexahydrate]                        |
| BENWUO      | 30.8     | 2.81 | 2.83 | 177.2     | 174.4     | 3.7   | 4   | 2    | 100 | 2-[(2,6-dimethylphenyl)amino]-N,N-diethyl-2-oxoethanaminium barbiturate                                      |
| BENWUO      | 18.1     | 2.75 | 2.75 | 170.9     | 174.6     | 3.7   | 4   | 2    | 100 | 2-[(2,6-dimethylphenyl)amino]-N,N-diethyl-2-oxoethanaminium barbiturate                                      |
| KEDZAV      | 16.0     | 2.80 | 2.92 | 174.4     | 176.5     | 5.8   | 16  | 4    | 120 | 8-dimethylaminonaphthalene-1-dimethylammonium barbiturate methanol solvate                                   |
| KEDZAV      | 14.3     | 2.78 | 2.97 | 174.7     | 170.1     | 5.8   | 16  | 4    | 120 | 8-dimethylaminonaphthalene-1-dimethylammonium barbiturate methanol solvate                                   |
| INEYOQ      | 12.8     | 2.79 | 2.79 | 176.9     | 176.9     | 5.7   | 4   | 0.5  | 293 | catena-[( $\mu_2$ -1,2-bis(4-pyridyl)ethane)-tetra-aqua-cobalt(II) bis(barbiturate) tetrahydrate]            |
| KEDZAV      | 10.9     | 2.86 | 2.89 | 174.3     | 179.3     | 5.8   | 16  | 4    | 120 | 8-dimethylaminonaphthalene-1-dimethylammonium barbiturate methanol solvate                                   |
| INEYUW      | 10.8     | 2.79 | 2.79 | 175.3     | 175.3     | 3.6   | 4   | 0.5  | 293 | catena-[( $\mu_2$ -1,2-bis(4-pyridyl)ethane)-tetra-aqua-iron(II) bis(barbiturate) tetrahydrate]              |
| INEZEH      | 10.7     | 2.81 | 2.81 | 176.0     | 176.0     | 5.0   | 4   | 0.5  | 293 | catena-[( $\mu_2$ -1,2-bis(4-pyridyl)ethane)-tetra-aqua-manganese(II) bis(barbiturate) tetrahydrate]         |
| ZABVAD      | 10.6     | 2.77 | 2.87 | 158.4     | 171.4     | 4.7   | 4   | 2    | 301 | 2-amino-6-methylpyridinium barbiturate dihydrate                                                             |
| WOPLIY      | 10.6     | 2.79 | 2.79 | 177.5     | 176.2     | 3.7   | 8   | 1    | 120 | tributyl-N-(4-methoxyphenyl)phosphoraniminium barbiturate                                                    |
| GATLIY      | 9.3      | 2.80 | 2.80 | 173.0     | 173.0     | 3.3   | 4   | 0.5  | 293 | catena-[( $\mu_2$ -(trans)-4,4'-ethene-1,2-diyl)pyridine)-tetra-aqua-iron(II) bis(barbiturate) tetrahydrate] |
| KEDZAV      | 7.6      | 2.77 | 2.90 | 172.9     | 176.5     | 5.8   | 16  | 4    | 120 | 8-dimethylaminonaphthalene-1-dimethylammonium barbiturate methanol solvate                                   |
| ERELUL01    | 6.6      | 2.79 | 2.98 | 177.9     | 175.5     | 4.5   | 4   | 1    | 150 | catena-[tetrakis( $\mu$ -barbiturate)-hexadeca-aqua-tetra-calcium tetrakis(barbiturate)]                     |
| ERELUL01    | 6.6      | 2.80 | 2.97 | 174.7     | 178.0     | 4.5   | 4   | 1    | 150 | catena-[tetrakis( $\mu$ -barbiturate)-hexadeca-aqua-tetra-calcium tetrakis(barbiturate)]                     |
| ERELUL      | 6.2      | 2.80 | 2.99 | 165.5     | 175.6     | 5.6   | 4   | 1    | 120 | catena-[tetrakis( $\mu$ -barbiturate)-hexadeca-aqua-tetra-calcium tetrakis(barbiturate)]                     |
| ERELUL      | 6.2      | 2.79 | 2.97 | 171.9     | 176.1     | 5.6   | 4   | 1    | 120 | catena-[tetrakis( $\mu$ -barbiturate)-hexadeca-aqua-tetra-calcium tetrakis(barbiturate)]                     |
| NEBFUY      | 5.8      | 2.84 | 2.98 | 174.1     | 178.5     | 5.5   | 4   | 2    | 296 | 4-(3-carboxy-1-ethyl-6-fluoro-4-oxo-1,4-dihydroquinolin-7-yl)-1-methylpiperazin-1-ium barbiturate hydrate    |
| JURLUG      | 4.7      | 2.79 | 2.80 | 172.4     | 170.3     | 2.7   | 4   | 1    | 293 | aqua-bis(1,10-phenanthroline)-copper bis(barbiturate) trihydrate                                             |
| QEPFIB      | 4.6      | 2.79 | 2.81 | 169.1     | 176.2     | 9.2   | 4   | 2    | 293 | methylammonium barbiturate                                                                                   |
| QEPFIB      | 4.6      | 2.81 | 2.84 | 173.0     | 168.3     | 9.2   | 4   | 2    | 293 | methylammonium barbiturate                                                                                   |



|          |     |      |      |       |       |     |   |     |     |                                                                                                            |
|----------|-----|------|------|-------|-------|-----|---|-----|-----|------------------------------------------------------------------------------------------------------------|
| DEFWUJ   | 3.3 | 2.82 | 3.12 | 177.2 | 170.6 | 2.5 | 4 | 0.5 | 295 | tetraaqua-bis(barbiturate)-cobalt(II)                                                                      |
| ESIDES   | 2.6 | 2.78 | 2.94 | 176.9 | 169.8 | 3.9 | 4 | 1   | 150 | hexa-aqua-magnesium bis(barbiturate) trihydrate                                                            |
| DEFWUJ01 | 2.1 | 2.82 | 3.09 | 164.2 | 170.1 | 9.4 | 4 | 0.5 | 150 | tetra-aqua-bis[6-oxypyrimidine-2,4(1H,3H)-dione]-cobalt                                                    |
| GUYRUN03 | 1.2 | 2.72 | 3.14 | 167.4 | 164.9 | 4.9 | 8 | 0.5 | 296 | triaqua-bis(6-oxidopyrimidine-2,4(1H,3H)-dione)-copper(II)                                                 |
| GUYRUN02 | 1.1 | 2.71 | 3.11 | 174.4 | 168.3 | 1.2 | 8 | 0.5 | 93  | triaqua-bis(barbiturato-O)-copper(II)                                                                      |
| GUYRUN04 | 1.1 | 2.72 | 3.13 | 163.5 | 164.8 | 2.7 | 8 | 0.5 | 150 | triaqua-bis[6-oxypyrimidine-2,4(1H,3H)-dione]-copper                                                       |
| ERELUL01 | 0.8 | 2.83 | 2.84 | 174.7 | 172.1 | 4.5 | 4 | 1   | 150 | catena-[tetrakis( $\mu$ -barbiturate)-hexadeca-aqua-tetra-calcium tetrakis(barbiturate)]                   |
| ERELUL01 | 0.8 | 2.86 | 2.86 | 167.8 | 173.5 | 4.5 | 4 | 1   | 150 | catena-[tetrakis( $\mu$ -barbiturate)-hexadeca-aqua-tetra-calcium tetrakis(barbiturate)]                   |
| QEPFOH   | 0.6 | 2.90 | 2.91 | 178.4 | 177.1 | 6.2 | 8 | 1   | 293 | dimethylammonium barbiturate                                                                               |
| CUHBAL   | 0.0 | 2.91 | 2.91 | 164.5 | 164.5 | 5.1 | 4 | 1   | 296 | catena-[( $\mu$ -pyridine-4-carbohydrazide)-triaqua-cobalt(II) bis(barbiturate) trihydrate]                |
| CUHBEP   | 0.0 | 2.91 | 2.91 | 170.1 | 170.1 | 3.5 | 4 | 1   | 296 | catena-[( $\mu$ -pyridine-4-carbohydrazide)-triaqua-zinc(II) bis(barbiturate) trihydrate]                  |
| ERELUL   | 0.0 | 2.82 | 2.82 | 178.0 | 178.0 | 5.6 | 4 | 1   | 120 | catena-[tetrakis( $\mu$ -barbiturate)-hexadeca-aqua-tetra-calcium tetrakis(barbiturate)]                   |
| ERELUL   | 0.0 | 2.85 | 2.85 | 178.8 | 178.8 | 5.6 | 4 | 1   | 120 | catena-[tetrakis( $\mu$ -barbiturate)-hexadeca-aqua-tetra-calcium tetrakis(barbiturate)]                   |
| ERELUL   | 0.0 | 2.85 | 2.85 | 173.1 | 173.1 | 5.6 | 4 | 1   | 120 | catena-[tetrakis( $\mu$ -barbiturate)-hexadeca-aqua-tetra-calcium tetrakis(barbiturate)]                   |
| ERELUL   | 0.0 | 2.86 | 2.86 | 172.3 | 172.3 | 5.6 | 4 | 1   | 120 | catena-[tetrakis( $\mu$ -barbiturate)-hexadeca-aqua-tetra-calcium tetrakis(barbiturate)]                   |
| ESOZOD   | 0.0 | 2.86 | 2.86 | 172.8 | 172.8 | 4.9 | 4 | 1   | 173 | 2,4-diaminopyridinium barbiturate                                                                          |
| EVELAV   | 0.0 | 2.82 | 2.82 | 174.9 | 174.9 | 6.5 | 8 | 1   | 150 | 8-(dimethylamino)-N,N-dimethylnaphthalen-1-aminium barbiturate unknown solvate                             |
| GATLEU   | 0.0 | 2.79 | 2.79 | 173.4 | 173.4 | 3.6 | 1 | 0.5 | 293 | (trans)-4,4'-ethene-1,2-diylpyridinium bis(barbiturate) dihydrate                                          |
| GIGQOD   | 0.0 | 2.89 | 2.89 | 178.3 | 178.3 | 5.1 | 2 | 1   | 293 | 2-amino-4,6-dimethylpyrimidinium barbiturate trihydrate                                                    |
| GIGQOD   | 0.0 | 2.85 | 2.85 | 175.3 | 175.3 | 5.1 | 2 | 1   | 293 | 2-amino-4,6-dimethylpyrimidinium barbiturate trihydrate                                                    |
| KEWSOX   | 0.0 | 2.83 | 2.83 | 173.4 | 173.4 | 5.9 | 4 | 1   | 296 | 4-(3-carboxy-1-cyclopropyl-6-fluoro-4-oxo-1,4-dihydroquinolin-7-yl)piperazin-1-ium barbiturate monohydrate |
| KINFEV   | 0.0 | 2.80 | 2.80 | 174.1 | 174.1 | 2.9 | 8 | 1   | 100 | aqua-(2,2'-bipyridyl)-(barbiturate)-chloro-copper(II) dihydrate                                            |
| MYTUW    | 0.0 | 2.86 | 2.86 | 175.2 | 175.2 | 7.7 | 4 | 1   | 293 | 1-aminoisoquinolinium barbiturate hemihydrate                                                              |
| MYVEI    | 0.0 | 2.81 | 2.81 | 177.6 | 177.6 | 5.9 | 2 | 1   | 300 | 1,10-phenanthroline barbiturate monohydrate                                                                |
| MYVIM    | 0.0 | 2.86 | 2.86 | 174.8 | 174.8 | 5.4 | 2 | 1   | 300 | 4-methoxypyridinium barbiturate dihydrate                                                                  |
| OQOXOJ   | 0.0 | 2.87 | 2.87 | 177.6 | 177.6 | 3.9 | 4 | 0.5 | 293 | diaqua-bis(4,4'-dimethyl-2,2'-bipyridine)-nickel(II) bis(barbiturate) tetrahydrate                         |
| OQOXUP   | 0.0 | 2.87 | 2.87 | 173.4 | 173.4 | 5.8 | 4 | 0.5 | 293 | diaqua-bis(4,4'-dimethyl-2,2'-bipyridine)-manganese(II) bis(barbiturate) tetrahydrate                      |
| QAFSOF   | 0.0 | 2.95 | 2.95 | 173.8 | 173.8 | 4.6 | 8 | 1   | 295 | pyrimidine-2,4,6-trione barbiturate sesquihydrate                                                          |
| RAYJOT   | 0.0 | 2.85 | 2.85 | 176.6 | 176.6 | 1.4 | 2 | 1   | 295 | catena-[( $\mu$ -aqua)-bis( $\mu$ -barbiturate)-aqua-barium]                                               |
| REZFIM   | 0.0 | 2.90 | 2.90 | 161.1 | 161.1 | 9.0 | 2 | 1   | 293 | (barbiturate)(hydridotris(5-methyl-3-phenyl-1-pyrazolyl)borato)zinc(II) methanol solvate                   |
| SUYNIM   | 0.0 | 2.91 | 2.91 | 174.3 | 174.3 | 9.0 | 2 | 1   | 293 | 1,3-dihydroxy-4,5-dimethyl-1H-imidazol-3-ium barbiturate                                                   |
| SUYNIM   | 0.0 | 2.86 | 2.86 | 174.0 | 174.0 | 9.0 | 2 | 1   | 293 | 1,3-dihydroxy-4,5-dimethyl-1H-imidazol-3-ium barbiturate                                                   |
| UFUWAW   | 0.0 | 2.86 | 2.86 | 178.0 | 178.0 | 6.1 | 4 | 0.5 | 100 | diaqua-bis(1,10-phenanthroline)-cobalt(II) bis(barbiturate) dihydrate                                      |

|          |      |      |      |       |       |     |    |   |     |                                                                                |
|----------|------|------|------|-------|-------|-----|----|---|-----|--------------------------------------------------------------------------------|
| ZIMTIA   | 0.0  | 2.79 | 2.79 | 174.9 | 174.9 | 5.5 | 8  | 1 | 293 | potassium barbiturate hemikis(pyrimidine-2,4,6(1H,3H,5H)-trione) sesquihydrate |
| <b>1</b> | 13.0 | 2.87 | 2.96 | 176.5 | 164.2 | 4.2 | 8  | 4 | 150 | imidazolium barbiturate                                                        |
|          | 13.0 | 2.90 | 3.01 | 171.2 | 156.6 |     |    |   |     |                                                                                |
|          | 16.6 | 2.88 | 2.92 | 176.1 | 165.9 |     |    |   |     |                                                                                |
|          | 16.6 | 2.89 | 2.89 | 177.0 | 168.8 |     |    |   |     |                                                                                |
| <b>2</b> | 7.0  | 2.91 | 2.91 | 177.2 | 177.2 | 5.0 | 16 | 2 | 150 | imidazolium barbiturate                                                        |
|          | 11.0 | 2.89 | 2.89 | 173.2 | 173.2 |     |    |   |     |                                                                                |
|          | 7.0  | 2.90 | 2.90 | 178.2 | 178.2 |     |    |   |     |                                                                                |
|          | 11.0 | 2.91 | 2.91 | 175.2 | 175.2 |     |    |   |     |                                                                                |
| <b>3</b> | 0.7  | 2.82 | 2.80 | 175.8 | 178.6 | 3.4 | 4  | 1 | 150 | imidazolium 2-thiobarbiturate                                                  |

**Table S9.** Geometry characteristics of a pair of HBA<sup>-</sup> anions that hydrogen-bonded with each other in a head-to-head fashion in structures found in Cambridge Structural Database (CSD; version 5.43, updates up to November 2022) and in **1–3**.  $\gamma$  (deg.) – Dihedral angle between the mean planes;  $d1,2$  (Å) – N...O distance;  $\alpha1,2$  (deg.) – N–H...O angle,  $R_1$  (%) – factor,  $Z$  – cell formula units;  $Z'$  – number of HBA<sup>-</sup> in crystallographically independent part; T (K) – experiment temperature.

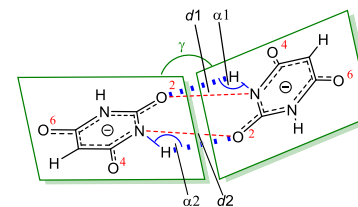

| CSD Refcode | $\gamma$ | d1   | d2   | $\alpha1$ | $\alpha2$ | $R_1$ | Z | $Z'$ | T   | Compound Name                                                                                                                                       |
|-------------|----------|------|------|-----------|-----------|-------|---|------|-----|-----------------------------------------------------------------------------------------------------------------------------------------------------|
| AMBARB      | 0.0      | 2.81 | 2.81 | 162.3     | 162.3     | 15.0  | 4 | 1    | 295 | ammonium barbiturate                                                                                                                                |
| AMBARB01    | 0.0      | 2.83 | 2.83 | 172.3     | 172.3     | 3.9   | 4 | 1    | 293 | ammonium barbiturate                                                                                                                                |
| CUHBOZ      | 0.0      | 2.86 | 2.86 | 167.4     | 167.4     | 2.9   | 1 | 0.5  | 296 | tetra-aqua-bis(pyridine-3-carboxamide)-cobalt(II) bis(barbiturate) dihydrate                                                                        |
| CUHBUF      | 0.0      | 2.87 | 2.87 | 167.5     | 167.5     | 3.0   | 1 | 0.5  | 296 | tetra-aqua-bis(pyridine-3-carboxamide)-zinc(II) bis(barbiturate) dihydrate                                                                          |
| CURKEH      | 0.0      | 2.89 | 2.89 | 171.7     | 171.7     | 8.2   | 2 | 1    | 296 | 4-(3-carboxy-1-ethyl-6,8-difluoro-4-oxo-1,4-dihydroquinolin-7-yl)-2-methylpiperazin-1-ium barbiturate pyrimidine-2,4,6(1H,3H,5H)-trione hydrate     |
| CURKIL      | 0.0      | 2.82 | 2.82 | 175.5     | 175.5     | 8.8   | 2 | 1    | 296 | 4-(3-carboxy-1-ethyl-6,8-difluoro-4-oxo-1,4-dihydroquinolin-7-yl)-2-methylpiperazin-1-ium barbiturate isophthalic acid methanol solvate monohydrate |
| DEFXAQ      | 0.0      | 2.85 | 2.85 | 178.7     | 178.7     | 4.0   | 4 | 0.25 | 295 | catena-[bis( $\mu$ -barbiturate)-diaqua-cobalt(II)]                                                                                                 |
| ESIDES      | 15.1     | 3.04 | 2.90 | 169.5     | 175.8     | 3.9   | 4 | 1    | 150 | hexa-aqua-magnesium bis(barbiturate) trihydrate                                                                                                     |
| GATLEU      | 0.0      | 2.88 | 2.88 | 176.0     | 176.0     | 3.6   | 1 | 0.5  | 293 | (trans)-4,4'-ethene-1,2-diyl dipyridinium bis(barbiturate) dihydrate                                                                                |
| GATLIY      | 9.3      | 2.85 | 2.85 | 176.0     | 176.0     | 3.3   | 4 | 0.5  | 293 | catena-[( $\mu$ -(trans)-4,4'-ethene-1,2-diyl dipyridine)-tetra-aqua-iron(II) bis(barbiturate) tetrahydrate]                                        |
| HOLFET      | 0.0      | 2.86 | 2.86 | 171.9     | 171.9     | 11.9  | 2 | 1    | 295 | (1-(4,6-diamino-5h-1,3,5-triazine-2-yl)-1,3,6,10,13-penta-azacyclotetradecane)-bis(perchlorato)-copper(II) barbiturate trihydrate                   |
| INEYOQ      | 12.8     | 2.83 | 2.83 | 170.9     | 170.9     | 5.7   | 4 | 0.5  | 293 | catena-[( $\mu$ -1,2-bis(4-pyridyl)ethane)-tetra-aqua-cobalt(II) bis(barbiturate) tetrahydrate]                                                     |
| INEYUW      | 10.8     | 2.84 | 2.84 | 174.4     | 174.4     | 3.6   | 4 | 0.5  | 293 | catena-[( $\mu$ -1,2-bis(4-pyridyl)ethane)-tetra-aqua-iron(II) bis(barbiturate) tetrahydrate]                                                       |
| INEZEH      | 10.7     | 2.86 | 2.86 | 172.2     | 172.2     | 5.0   | 4 | 0.5  | 293 | catena-[( $\mu$ -1,2-bis(4-pyridyl)ethane)-tetra-aqua-manganese(II) bis(barbiturate) tetrahydrate]                                                  |
| JURLUG      | 4.7      | 2.87 | 2.91 | 174.8     | 168.4     | 2.7   | 4 | 1    | 293 | aqua-bis(1,10-phenanthroline)-copper bis(barbiturate) trihydrate                                                                                    |
| KEWSOX      | 0.0      | 2.92 | 2.92 | 163.1     | 163.1     | 5.9   | 4 | 1    | 296 | 4-(3-carboxy-1-cyclopropyl-6-fluoro-4-oxo-1,4-dihydroquinolin-7-yl)piperazin-1-ium barbiturate monohydrate                                          |
| KINFEV      | 0.0      | 2.76 | 2.76 | 168.1     | 168.1     | 2.9   | 8 | 1    | 100 | aqua-(2,2'-bipyridyl)-(barbiturate)-chloro-copper(II) dihydrate                                                                                     |
| MUYVIM      | 0.0      | 2.96 | 2.96 | 173.7     | 173.7     | 5.4   | 2 | 1    | 300 | 4-methoxypyridinium barbiturate dihydrate                                                                                                           |
| NEBFUY      | 5.8      | 2.98 | 2.85 | 162.8     | 169.0     | 5.5   | 4 | 2    | 296 | 4-(3-carboxy-1-ethyl-6-fluoro-4-oxo-1,4-dihydroquinolin-7-yl)-1-methylpiperazin-1-ium barbiturate hydrate                                           |
| OQEPAD      | 0.0      | 2.85 | 2.85 | 167.3     | 167.3     | 5.1   | 4 | 0.5  | 293 | tetra-aqua-(5,5'-dimethyl-2,2'-bipyridine)-cobalt(II) bis(barbiturate) dihydrate                                                                    |
| RAGLAO      | 0.0      | 2.87 | 2.87 | 179.1     | 179.1     | 1.9   | 4 | 0.25 | 295 | catena-(bis( $\mu$ -barbiturate)-diaqua-di-manganese(II))                                                                                           |
| RAGLAO01    | 0.0      | 2.85 | 2.85 | 176.2     | 176.2     | 2.7   | 4 | 0.25 | 120 | catena-(bis( $\mu$ -barbiturate)-diaqua-manganese)                                                                                                  |
| REZFIM      | 0.0      | 2.91 | 2.91 | 162.4     | 162.4     | 9.0   | 2 | 1    | 293 | (barbiturate)(hydrottris(5-methyl-3-phenyl-1-pyrazolyl)borato-)zinc(II) methanol solvate                                                            |
| UFUWAW      | 0.0      | 2.88 | 2.88 | 175.1     | 175.1     | 6.1   | 4 | 0.5  | 100 | diaqua-bis(1,10-phenanthroline)-cobalt(II) bis(barbiturate) dihydrate                                                                               |
| ZABVAD      | 10.6     | 2.97 | 2.84 | 165.4     | 171.5     | 4.7   | 4 | 2    | 301 | 2-amino-6-methylpyridinium barbiturate dihydrate                                                                                                    |

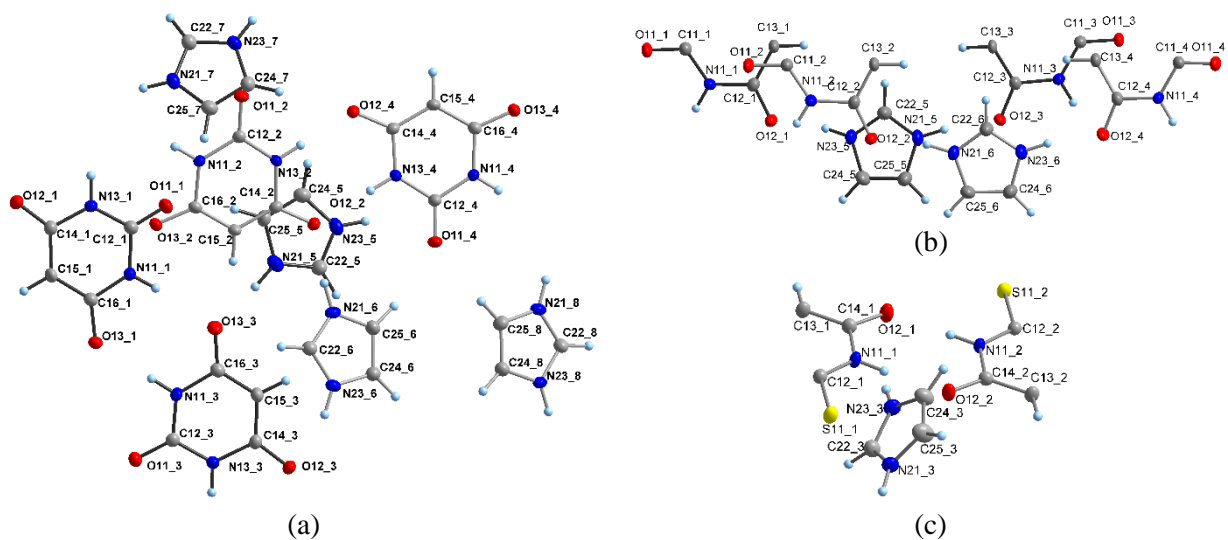

**Fig. S1.** Crystallographically independent part of structures **1–3** with numbering of non-hydrogen atoms. Atomic displacement ellipsoids are shown at the 50% probability level.

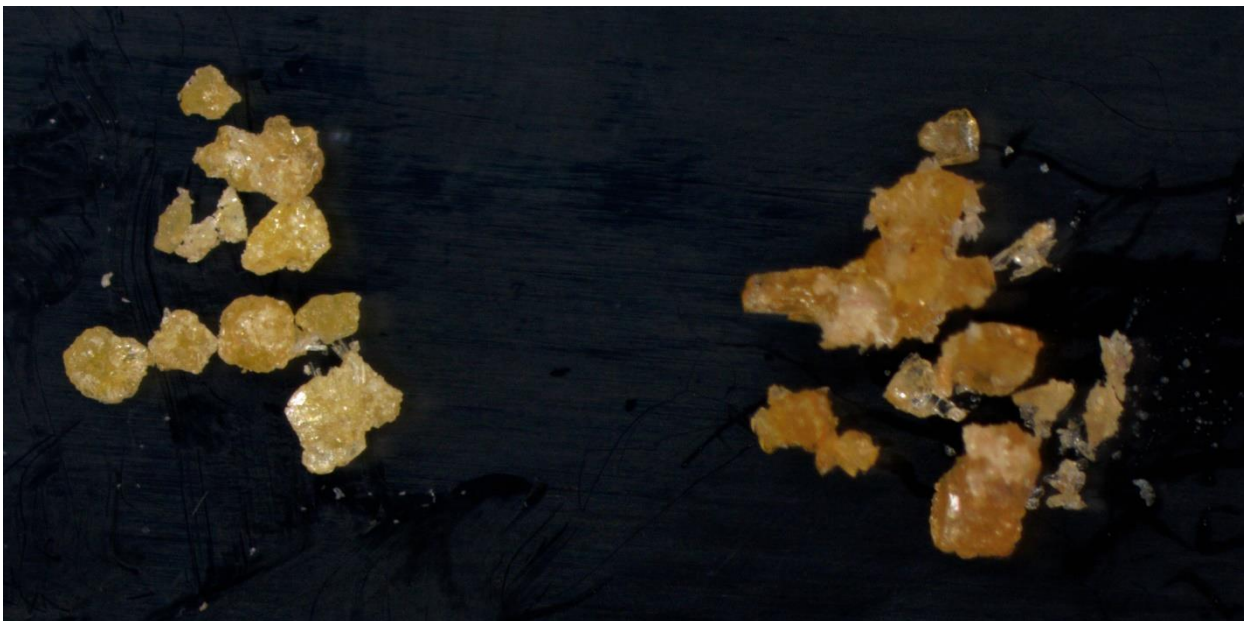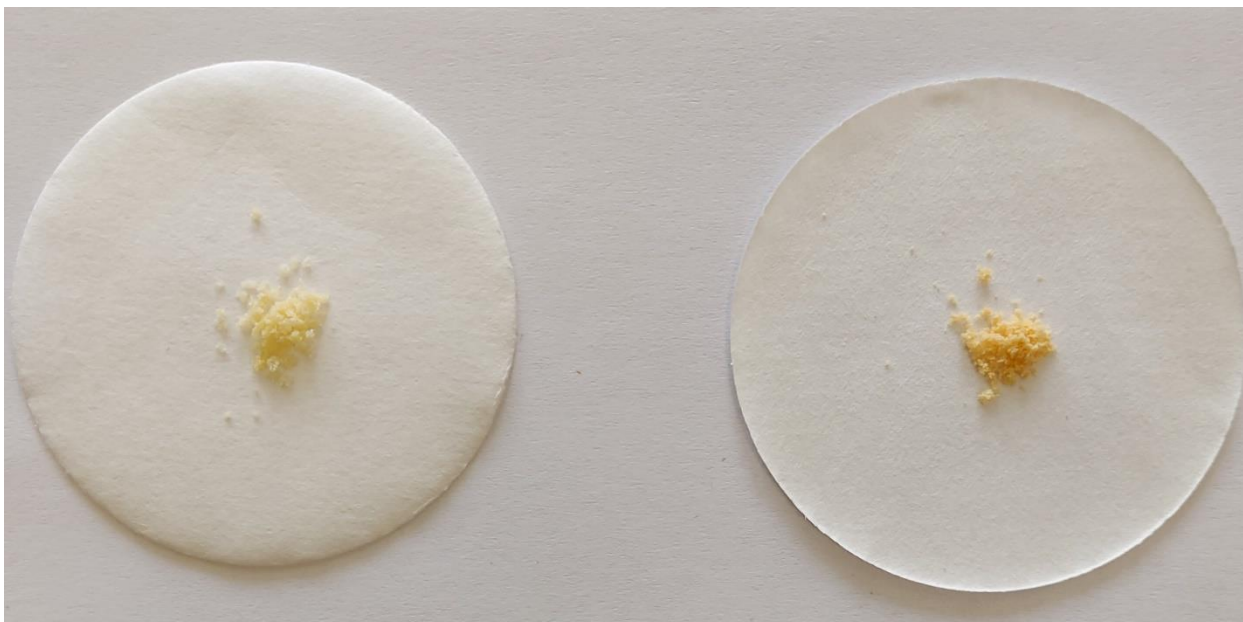

**Fig. S2.** Photographs of **1** (left) and **2** (right) in the crystal and powder forms.

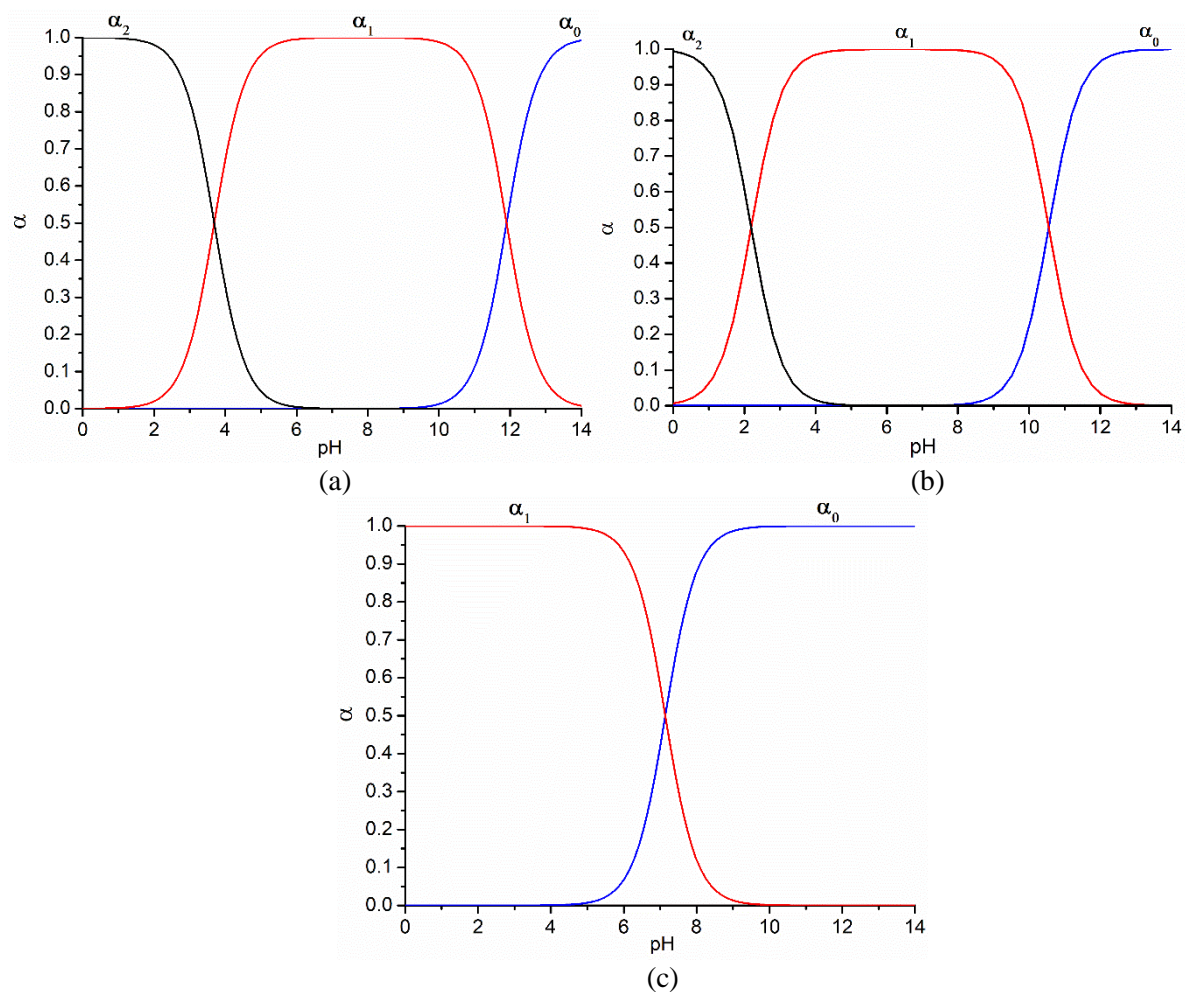

**Fig. S3.** Species distribution diagrams of H<sub>2</sub>BA (a), H<sub>2</sub>TBA (b) and Im (c) as a function of pH:  $\alpha_2$  [H<sub>2</sub>(T)BA],  $\alpha_1$  [H(T)BA<sup>-</sup>] (a, b) or [HIm<sup>+</sup>] (c),  $\alpha_0$  [(T)BA<sup>2-</sup>] (a, b) or [Im] (c) ( $C = 0.01$  mol/L).

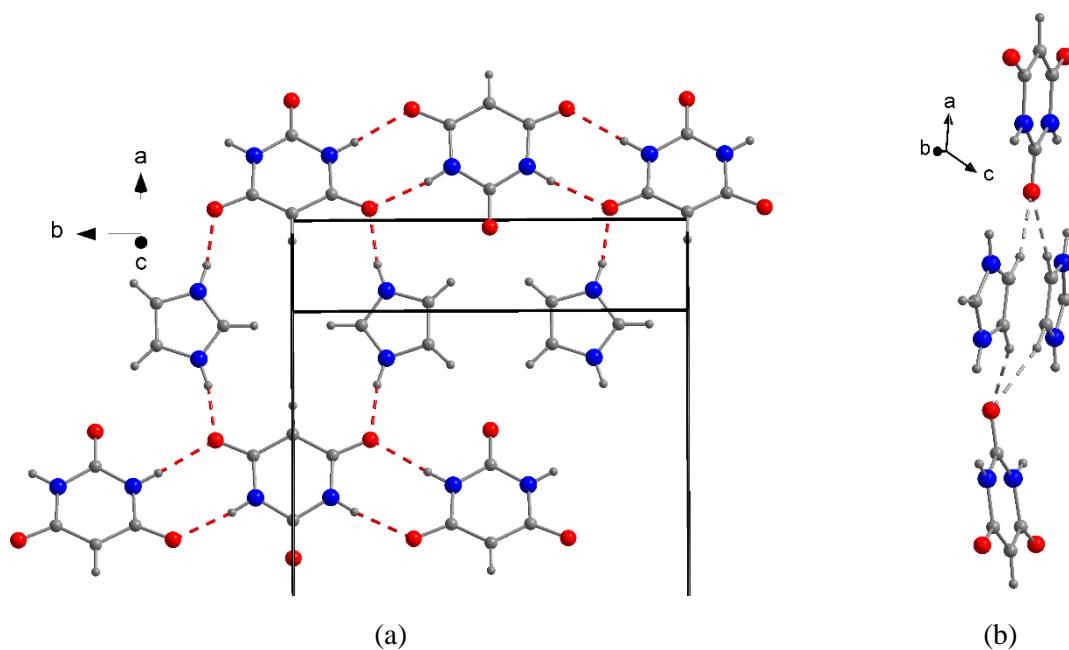

**Fig. S4.** The structure of a layer in **2** composed from hydrogen-bonded  $\text{HBA}^-$  and  $\text{HIm}^+$  ions (a). The hydrogen bonds  $\text{N-H}\cdots\text{O}$  are highlighted with red dashed lines. A fragment of the layer showing weak  $\text{C-H}\cdots\text{O}$  contacts (b) highlighted with grey dashed lines.

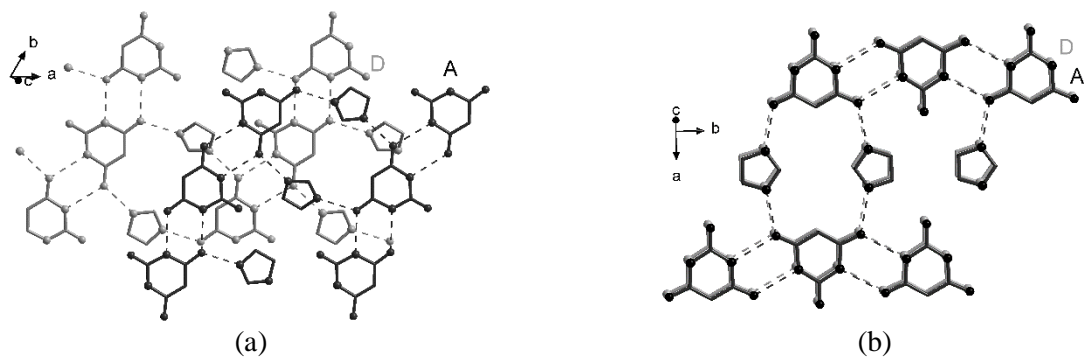

**Fig. S5.** Arrangement of inversion-related A and D layers in compounds **1** (a) and **2** (b). The corresponding B and C layers are not shown for clarity.



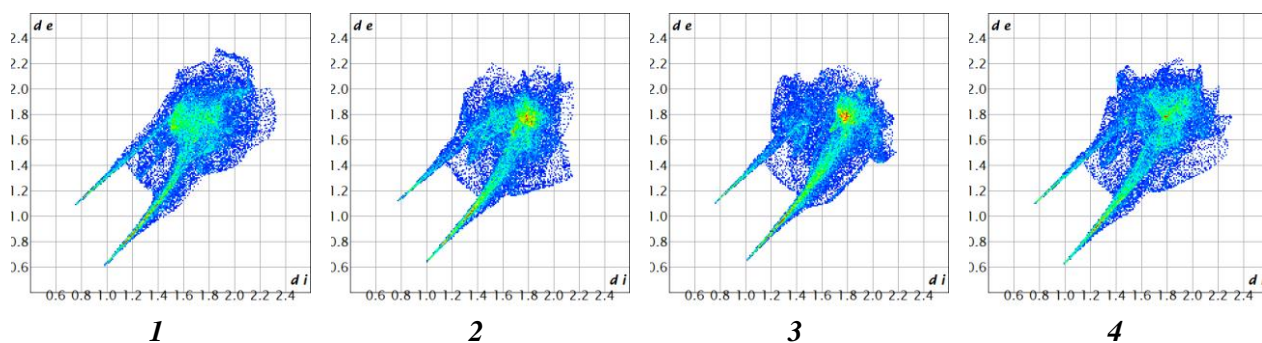

**Fig. S6.** Fingerprint plots for four crystallographically independent HBA<sup>-</sup> anions in compound **1** calculated in CrystalExplorer. *d<sub>i</sub>* And *d<sub>e</sub>* are the distances (Å) from the Hirshfeld surface to the nearest nucleus inside and outside the surface, correspondingly.

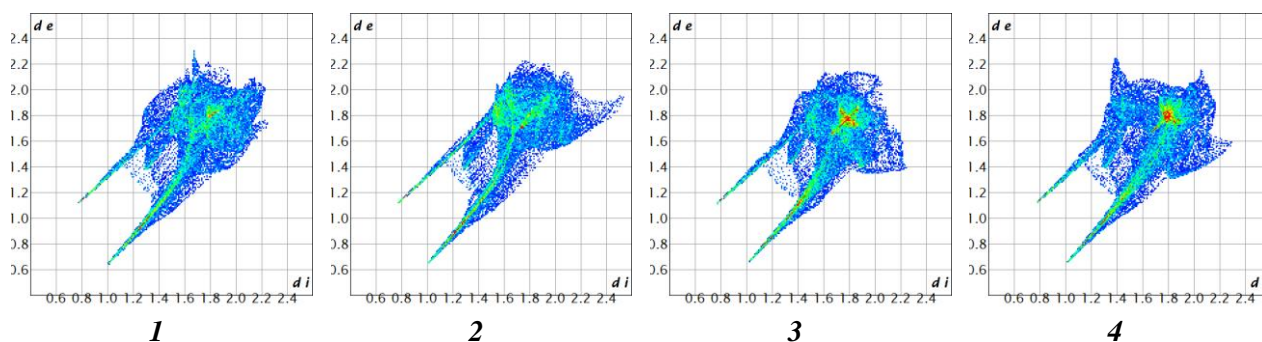

**Fig. S7.** Fingerprint plots for four crystallographically independent HBA<sup>-</sup> anions in compound **2** calculated in CrystalExplorer. *d<sub>i</sub>* And *d<sub>e</sub>* are the distances (Å) from the Hirshfeld surface to the nearest nucleus inside and outside the surface, correspondingly.

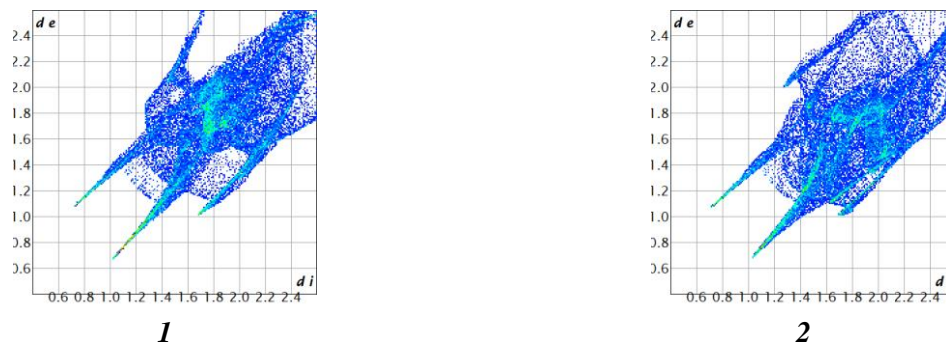

**Fig. S8.** Fingerprint plots for two crystallographically independent HTBA<sup>-</sup> anions in compound **3** calculated in CrystalExplorer. *d<sub>i</sub>* And *d<sub>e</sub>* are the distances (Å) from the Hirshfeld surface to the nearest nucleus inside and outside the surface, correspondingly.

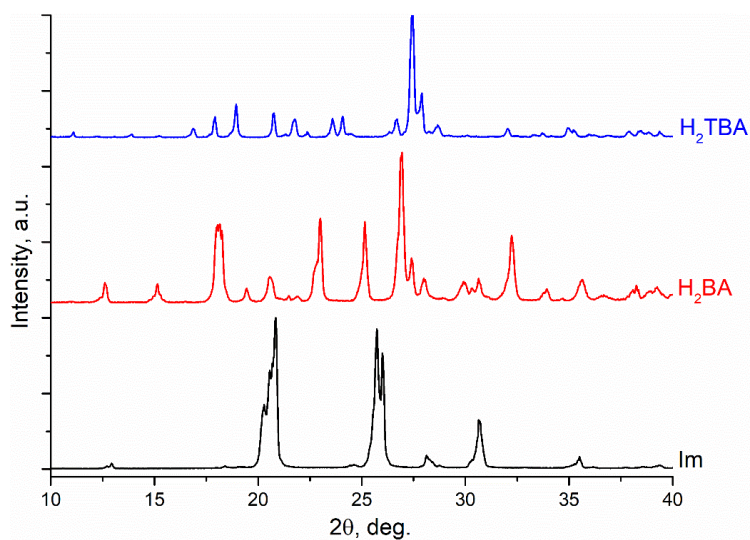

(a)

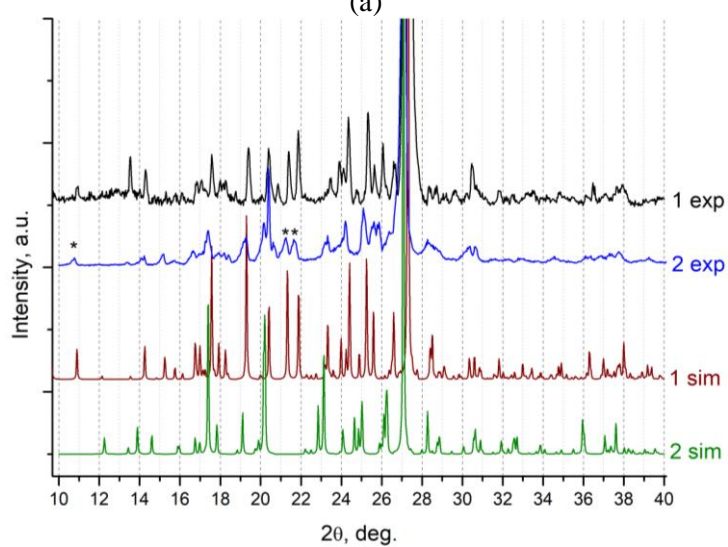

(b)

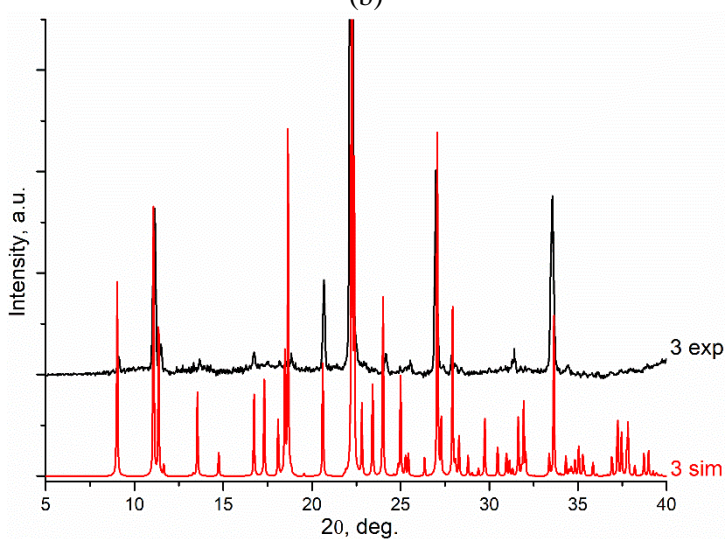

(c)

**Fig. S9.** Powder X-ray diffraction (XRD) patterns of the starting materials (a), salts **1**, **2** (b) and **3** (c) from the experimental study (exp) and simulated from the single-crystal XRD data (sim). Some characteristic peaks of **1** observed in the experimental XRD pattern of **2** (b) are highlighted as \*.

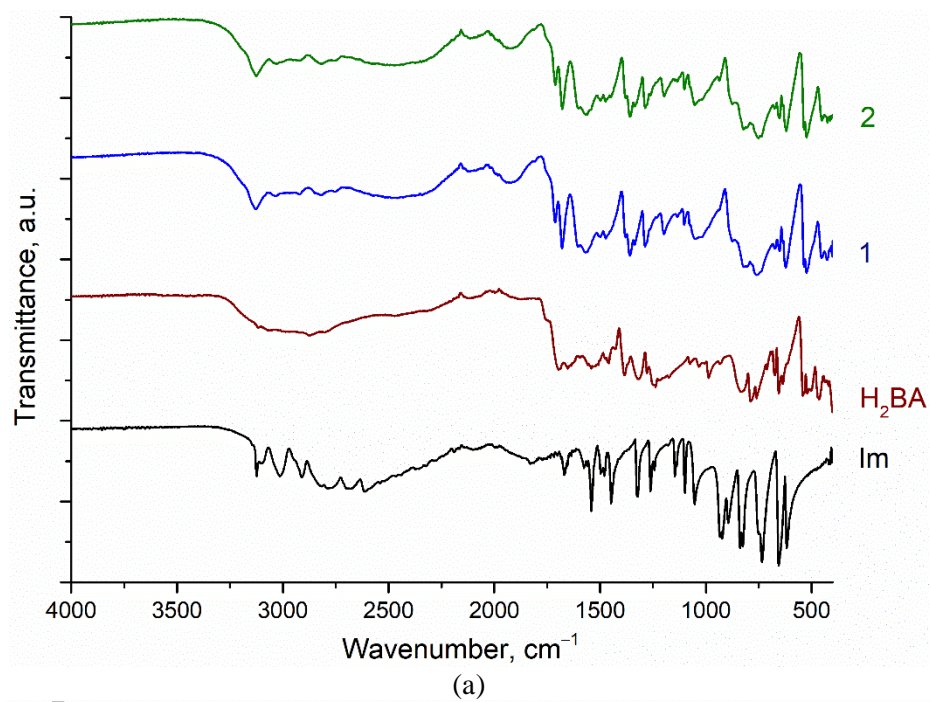

(a)

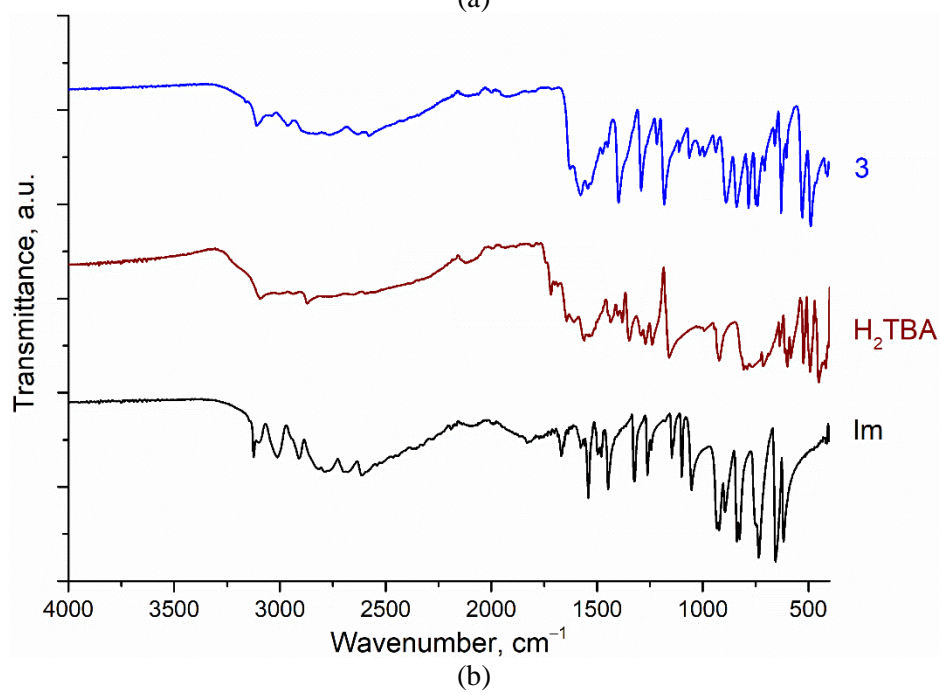

(b)

**Fig. S10.** Infrared spectra of the starting materials and salts 1–3.

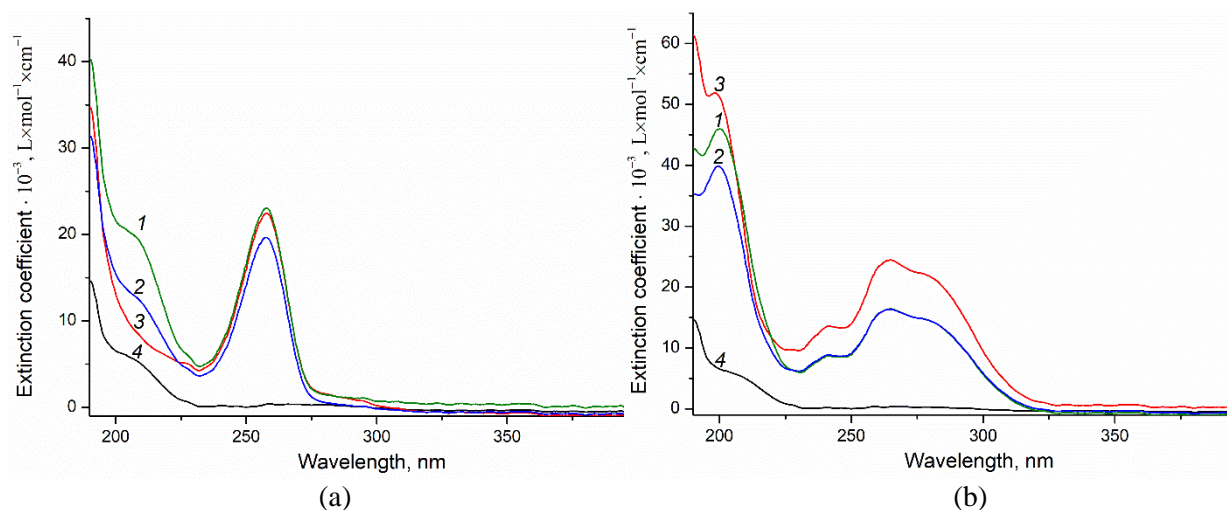

**Fig. S11.** Ultraviolet spectra of aqueous solutions ( $t = 25 \text{ }^{\circ}\text{C}$ ) of  $\text{H}_2\text{BA} : \text{Im}$  mixture ( $C_{\text{acid}} = 3 \cdot 10^{-5} \text{ mol/L}$ ,  $C_{\text{Im}} = 6 \cdot 10^{-5} \text{ mol/L}$ , pH 6.30; 1a), salt **2** ( $C_{\text{acid}} = C_{\text{Im}} = 4 \cdot 10^{-5} \text{ mol/L}$ , pH 6.57; 2a),  $\text{H}_2\text{BA}$  ( $C = 3 \cdot 10^{-5} \text{ mol/L}$ , pH 6.84; 3a), Im ( $C = 6 \cdot 10^{-5} \text{ mol/L}$ , pH 7.26; 4a) and  $\text{H}_2\text{TBA} : \text{Im}$  mixture ( $C_{\text{acid}} = 3 \cdot 10^{-5} \text{ mol/L}$ ,  $C_{\text{Im}} = 6 \cdot 10^{-5} \text{ mol/L}$ , pH 6.13; 1b), salt **3** ( $C_{\text{acid}} = C_{\text{Im}} = 4 \cdot 10^{-5} \text{ mol/L}$ , pH 6.04; 2b),  $\text{H}_2\text{TBA}$  ( $C = 3 \cdot 10^{-5} \text{ mol/L}$ , pH 6.83; 3b), Im ( $C = 6 \cdot 10^{-5} \text{ mol/L}$ , pH 7.26; 4b).



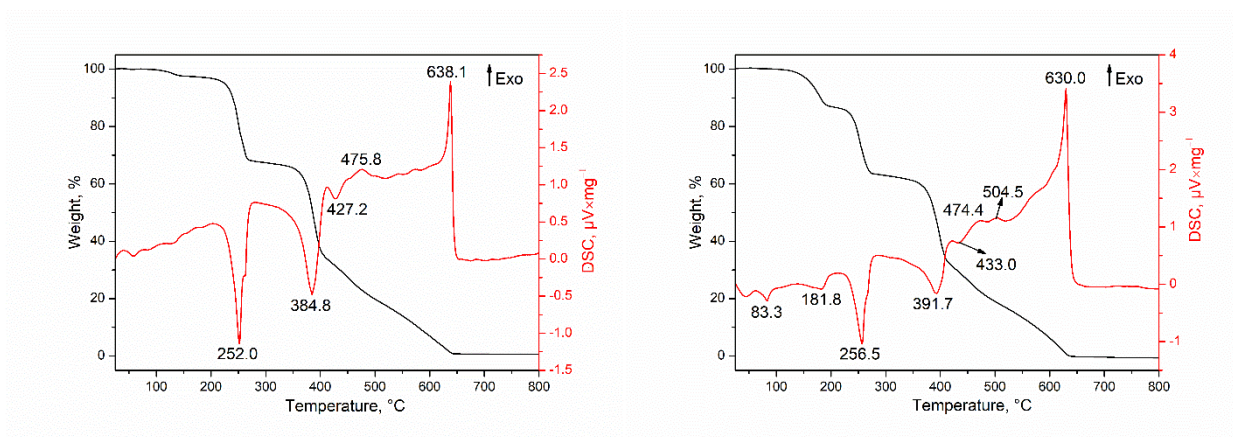

(a)

(b)

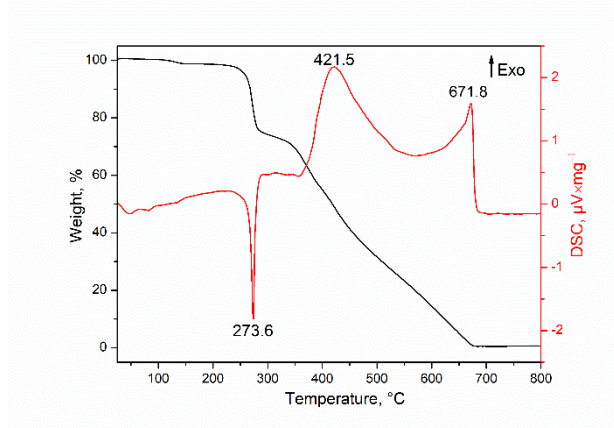

(c)

**Fig. S12.** TG-DSC curves of salts 1–3 (a)–(c) in air.
